# Supplementary material
Source: publisher figshare collection journal article supplement (https://acs.figshare.com/ndownloader/files/24641456)
Supplement: Supplementary file 1 [file 24641456]

Archive with 7 entries (7 files):
- Supplementary information.pdf
- Supplementary movie 1.mp4
- Supplementary movie 2.mp4
- Supplementary movie 3.mp4
- Supplementary movie 4.mp4
- Supplementary movie 5.mp4
- Supplementary movie 6.avi
